# Supplementary material for: Anthocyanins Extracted from Oryza sativa L. Prevent Fluorouracil-Induced Nuclear Factor-κB Activation in Oral Mucositis: In Vitro and In Vivo Studies
Source: Int J Mol Sci. 2018 Sep 29;19(10):2981. doi: 10.3390/ijms19102981 (PMC6213925; doi:10.3390/ijms19102981)
Supplement: Supplementary file 1 [file ijms-19-02981-s001.pdf]

## Group A

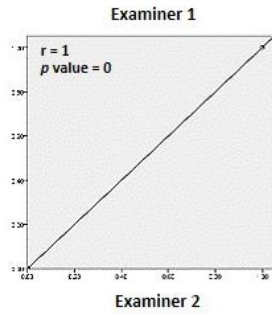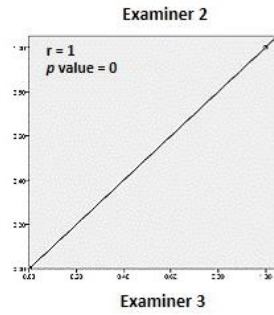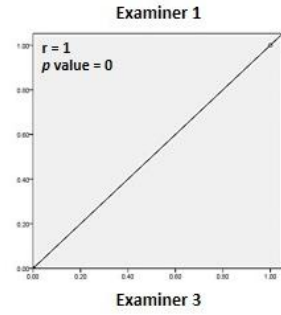

## Group B

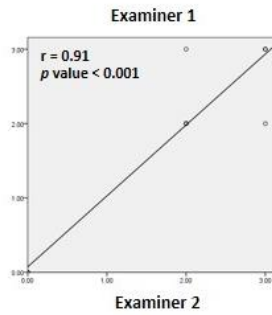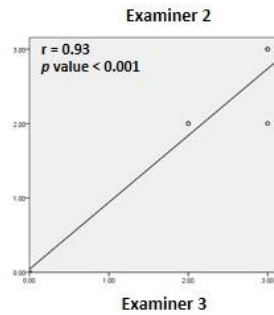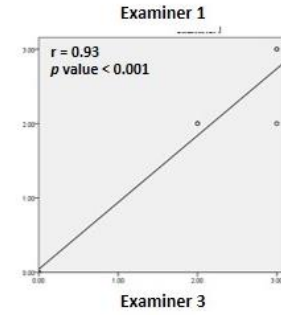

## Group C

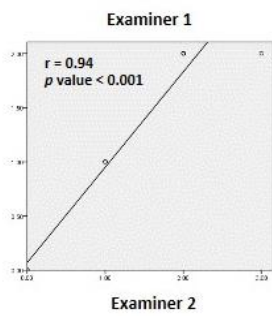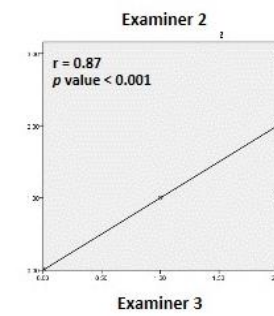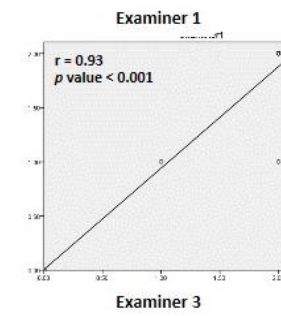

## Group D

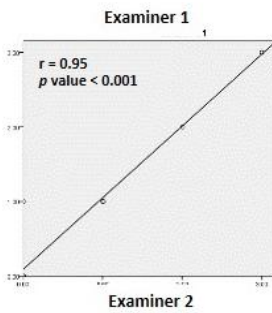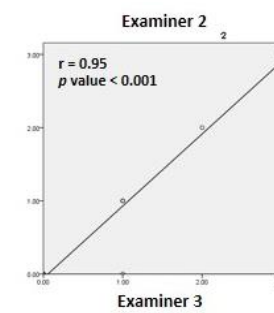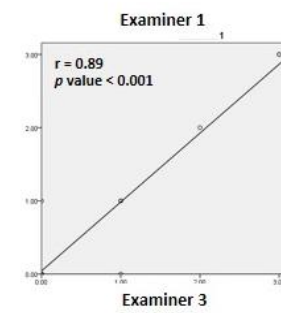

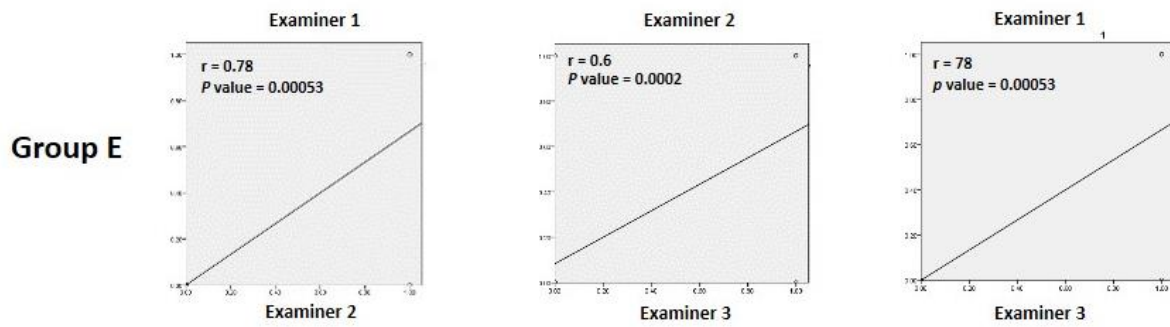

**Figure S1:** Inter-examiner reliability of macroscopic score measurement. The macroscopic scores on Days 17 and 29 were measured in all groups of rats (A to E) by three examiners. Pearson's correlation coefficient ( $r$ ) was used to show the correlation between the examiners and  $p$  values are shown.  $p$  value  $< 0.05$  was considered statistically significant.

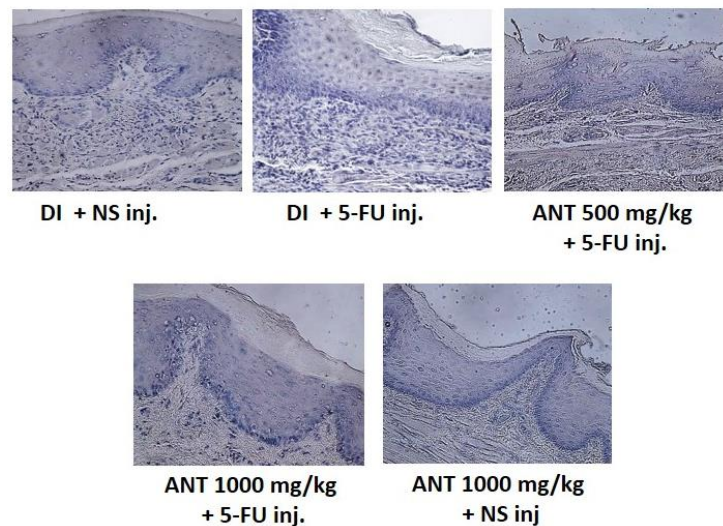

**Figure S2:** Immunohistochemistry of control isotype- IgG in buccal mucosa after 29 days, oral mucositis was induced by i.p. injection of 5-FU 60 mg/kg. Animals were gavage-fed with ANT 500 mg/kg, 1000 mg/kg or normal saline (NS) daily. Tissues were immunostained with anti-mouse IgG. No positive staining of the tissues in the samples. DI, distilled water. All images were obtained at  $\times 200$  magnification.
